# Supplementary material for: Dehydrocoupling of dimethylamine borane by titanocene: elucidation of ten years of inconsistency between theoretical and experimental descriptions
Source: Royal Society of Chemistry journal article supplement (doi:10.1039/c8cp01970c), 2018-01-01
Supplement: c8cp01970c1.pdf [file c8cp01970c1.pdf]

## Supporting Information

### **Dehydrocoupling of dimethylamine borane by titanocene: Elucidation of ten years of inconsistency between theoretical and experimental descriptions.**

Jingwen ZHU, † Emilie-Laure ZINS, † and Mohammad Esmail ALIKHANI <sup>\*†</sup>

† Sorbonne Université, CNRS, De la Molécule aux Nano-Objets: Réactivité, Interactions Spectroscopies, MONARIS, 75005, Paris France

Gas phase electronic energy (E), zero-point corrected (E+ZPE), Gibbs (G) and enthalpies (H)

Effect of basis sets

| B3LYP-GD3BJ/6-31G*+6-31++G**+LanL2DZ                   |             |                 |                             |                    |                        |                             |                        |                        |
|--------------------------------------------------------|-------------|-----------------|-----------------------------|--------------------|------------------------|-----------------------------|------------------------|------------------------|
|                                                        | E<br>(a.u.) | E+ZPE<br>(a.u.) | Gibbs free energy<br>(a.u.) | Enthalpy<br>(a.u.) | $\Delta E$<br>(kJ/mol) | $\Delta(E+ZPE)$<br>(kJ/mol) | $\Delta G$<br>(kJ/mol) | $\Delta H$<br>(kJ/mol) |
| <b>Cp<sub>2</sub>Ti</b>                                | -445.2026   | -445.0367       | -445.0751                   | -445.0256          |                        |                             |                        |                        |
| <b>HNMe<sub>2</sub>BH<sub>3</sub></b>                  | -161.8577   | -161.7301       | -161.7579                   | -161.7233          |                        |                             |                        |                        |
| <b>Cp<sub>2</sub>Ti+HNMe<sub>2</sub>BH<sub>3</sub></b> | -607.0603   | -606.7668       | -606.8330                   | -606.7489          | 0.0                    | 0.0                         | 0.0                    | 0.0                    |
| <b>S<sub>1</sub></b>                                   | -607.0899   | -606.7931       | -606.8371                   | -606.7756          | -77.6                  | -69.1                       | -10.9                  | -70.2                  |
| <b>TS<sub>1_2</sub></b>                                | -607.0798   | -606.7854       | -606.8263                   | -606.7694          | -51.1                  | -48.9                       | 17.4                   | -54.0                  |

| B3LYP-GD3BJ/6-311++G(2d,2p)+LanL2DZ                    |             |                 |                             |                    |                        |                             |                        |                        |
|--------------------------------------------------------|-------------|-----------------|-----------------------------|--------------------|------------------------|-----------------------------|------------------------|------------------------|
|                                                        | E<br>(a.u.) | E+ZPE<br>(a.u.) | Gibbs free energy<br>(a.u.) | Enthalpy<br>(a.u.) | $\Delta E$<br>(kJ/mol) | $\Delta(E+ZPE)$<br>(kJ/mol) | $\Delta G$<br>(kJ/mol) | $\Delta H$<br>(kJ/mol) |
| <b>Cp<sub>2</sub>Ti</b>                                | -445.3299   | -445.1653       | -445.2030                   | -445.1542          |                        |                             |                        |                        |
| <b>HNMe<sub>2</sub>BH<sub>3</sub></b>                  | -161.9090   | -161.7821       | -161.8100                   | -161.7753          |                        |                             |                        |                        |
| <b>Cp<sub>2</sub>Ti+HNMe<sub>2</sub>BH<sub>3</sub></b> | -607.2389   | -606.9475       | -607.0129                   | -606.9295          | 0.0                    | 0.0                         | 0.0                    | 0.0                    |
| <b>S<sub>1</sub></b>                                   | -607.2669   | -606.9722       | -607.0167                   | -606.9545          | -73.4                  | -64.9                       | -10.0                  | -65.5                  |
| <b>TS<sub>1_2</sub></b>                                | -607.2572   | -606.9647       | -607.0056                   | -606.9486          | -48.0                  | -45.2                       | 19.1                   | -50.1                  |

| B3LYP-GD3BJ/6-311++G(2d,2p)                            |             |                 |                             |                    |                        |                             |                        |                        |
|--------------------------------------------------------|-------------|-----------------|-----------------------------|--------------------|------------------------|-----------------------------|------------------------|------------------------|
|                                                        | E<br>(a.u.) | E+ZPE<br>(a.u.) | Gibbs free energy<br>(a.u.) | Enthalpy<br>(a.u.) | $\Delta E$<br>(kJ/mol) | $\Delta(E+ZPE)$<br>(kJ/mol) | $\Delta G$<br>(kJ/mol) | $\Delta H$<br>(kJ/mol) |
| <b>Cp<sub>2</sub>Ti</b>                                | -1236.7054  | -1236.5406      | -1236.5761                  | -1236.5304         |                        |                             |                        |                        |
| <b>HNMe<sub>2</sub>BH<sub>3</sub></b>                  | -161.9090   | -161.7821       | -161.8100                   | -161.7753          |                        |                             |                        |                        |
| <b>Cp<sub>2</sub>Ti+HNMe<sub>2</sub>BH<sub>3</sub></b> | -1398.6144  | -1398.3227      | -1398.3860                  | -1398.3057         | 0.0                    | 0.0                         | 0.0                    | 0.0                    |
| <b>S<sub>1</sub></b>                                   | -1398.6419  | -1398.3471      | -1398.3921                  | -1398.3294         | -72.2                  | -64.1                       | -15.8                  | -62.3                  |
| <b>TS<sub>1,2</sub></b>                                | -1398.6324  | -1398.3399      | -1398.3809                  | -1398.3238         | -47.2                  | -45.2                       | 13.5                   | -47.6                  |

| B3LYP-GD3BJ/6-311++G(3df,3pd)                          |             |                 |                             |                    |                        |                             |                        |                        |
|--------------------------------------------------------|-------------|-----------------|-----------------------------|--------------------|------------------------|-----------------------------|------------------------|------------------------|
|                                                        | E<br>(a.u.) | E+ZPE<br>(a.u.) | Gibbs free energy<br>(a.u.) | Enthalpy<br>(a.u.) | $\Delta E$<br>(kJ/mol) | $\Delta(E+ZPE)$<br>(kJ/mol) | $\Delta G$<br>(kJ/mol) | $\Delta H$<br>(kJ/mol) |
| <b>Cp<sub>2</sub>Ti</b>                                | -1236.7212  | -1236.5561      | -1236.5935                  | -1236.5450         |                        |                             |                        |                        |
| <b>HNMe<sub>2</sub>BH<sub>3</sub></b>                  | -161.9144   | -161.7877       | -161.8155                   | -161.7808          |                        |                             |                        |                        |
| <b>Cp<sub>2</sub>Ti+HNMe<sub>2</sub>BH<sub>3</sub></b> | -1398.6356  | -1398.3438      | -1398.4090                  | -1398.3259         | 0.0                    | 0.0                         | 0.0                    | 0.0                    |
| <b>S<sub>1</sub></b>                                   | -1398.6632  | -1398.3682      | -1398.4125                  | -1398.3506         | -72.6                  | -64.3                       | -9.1                   | -65.0                  |
| <b>TS<sub>1,2</sub></b>                                | -1398.6539  | -1398.3610      | -1398.4019                  | -1398.3450         | -48.0                  | -45.2                       | 18.6                   | -50.1                  |

Gas phase electronic energy (E), zero-point corrected (E+ZPE), Gibbs (G) and enthalpies (H)

Path 1: From the [Cp<sub>2</sub>Ti(η<sup>1</sup>-BH<sub>3</sub>·NHMe<sub>2</sub>)] adduct to the linear diborazane

| B3LYP-GD3BJ/6-31G*+6-31++G**+LanL2DZ                  |             |                 |                             |                    |                |                      |                |                |
|-------------------------------------------------------|-------------|-----------------|-----------------------------|--------------------|----------------|----------------------|----------------|----------------|
|                                                       | E<br>(a.u.) | E+ZPE<br>(a.u.) | Gibbs free energy<br>(a.u.) | Enthalpy<br>(a.u.) | ΔE<br>(kJ/mol) | Δ(E+ZPE)<br>(kJ/mol) | ΔG<br>(kJ/mol) | ΔH<br>(kJ/mol) |
| Cp <sub>2</sub> Ti                                    | -445.2026   | -445.0367       | -445.0751                   | -445.0256          |                |                      |                |                |
| HNMe <sub>2</sub> BH <sub>3</sub>                     | -161.8577   | -161.7301       | -161.7579                   | -161.7233          |                |                      |                |                |
| Cp <sub>2</sub> Ti+2HNMe <sub>2</sub> BH <sub>3</sub> | -768.9180   | -768.4969       | -768.5909                   | -768.4721          | 0.0            | 0.0                  | 0.0            | 0.0            |
| S <sub>1</sub> + HNMe <sub>2</sub> BH <sub>3</sub>    | -768.9476   | -768.5232       | -768.5950                   | -768.4988          | -77.6          | -69.1                | -10.9          | -70.2          |
| TS <sub>1_2</sub> + HNMe <sub>2</sub> BH <sub>3</sub> | -768.9375   | -768.5155       | -768.5842                   | -768.4927          | -51.1          | -48.9                | 17.4           | -54.0          |
| S <sub>2</sub> + HNMe <sub>2</sub> BH <sub>3</sub>    | -768.9848   | -768.5609       | -768.6294                   | -768.5381          | -175.3         | -168.2               | -101.1         | -173.3         |
| S <sub>3</sub> + HNMe <sub>2</sub> BH <sub>3</sub>    | -768.9544   | -768.5377       | -768.6122                   | -768.5133          | -95.7          | -107.4               | -55.9          | -108.1         |
| S <sub>4</sub>                                        | -768.9915   | -768.5667       | -768.6194                   | -768.5435          | -192.9         | -183.3               | -74.9          | -187.4         |
| S <sub>5</sub>                                        | -769.0004   | -768.5763       | -768.6263                   | -768.5535          | -216.3         | -208.5               | -93.2          | -213.6         |

| B3LYP-GD3BJ-PCM(toluene)/6-31G*+6-31++G**+LanL2DZ     |             |                 |                             |                    |                |                      |                |                |
|-------------------------------------------------------|-------------|-----------------|-----------------------------|--------------------|----------------|----------------------|----------------|----------------|
|                                                       | E<br>(a.u.) | E+ZPE<br>(a.u.) | Gibbs free energy<br>(a.u.) | Enthalpy<br>(a.u.) | ΔE<br>(kJ/mol) | Δ(E+ZPE)<br>(kJ/mol) | ΔG<br>(kJ/mol) | ΔH<br>(kJ/mol) |
| Cp <sub>2</sub> Ti                                    | -445.2057   | -445.0400       | -445.0776                   | -445.0289          |                |                      |                |                |
| HNMe <sub>2</sub> BH <sub>3</sub>                     | -161.8638   | -161.7363       | -161.7641                   | -161.7294          |                |                      |                |                |
| Cp <sub>2</sub> Ti+2HNMe <sub>2</sub> BH <sub>3</sub> | -768.9334   | -768.5125       | -768.6058                   | -768.4878          | 0.0            | 0.0                  | 0.0            | 0.0            |
| S <sub>1</sub> + HNMe <sub>2</sub> BH <sub>3</sub>    | -768.9592   | -768.5350       | -768.6073                   | -768.5106          | -67.9          | -58.9                | -3.9           | -59.9          |
| TS <sub>1_2</sub> + HNMe <sub>2</sub> BH <sub>3</sub> | -768.9477   | -768.5261       | -768.5951                   | -768.5032          | -37.6          | -35.7                | 28.3           | -40.6          |
| S <sub>2</sub> + HNMe <sub>2</sub> BH <sub>3</sub>    | -768.9944   | -768.5707       | -768.6392                   | -768.5479          | -160.1         | -152.7               | -87.6          | -157.8         |
| S <sub>3</sub> + HNMe <sub>2</sub> BH <sub>3</sub>    | -768.9638   | -768.5473       | -768.6239                   | -768.5220          | -79.9          | -91.3                | -47.5          | -89.8          |
| S <sub>4</sub>                                        | -769.0002   | -768.5753       | -768.6278                   | -768.5522          | -175.5         | -164.8               | -57.6          | -169.2         |

|                      |           |           |           |           |        |        |       |        |
|----------------------|-----------|-----------|-----------|-----------|--------|--------|-------|--------|
| <b>S<sub>5</sub></b> | -769.0053 | -768.5813 | -768.6312 | -768.5585 | -188.9 | -180.5 | -66.7 | -185.8 |
|----------------------|-----------|-----------|-----------|-----------|--------|--------|-------|--------|

**Path 2: From the [Cp<sub>2</sub>Ti(η<sup>2</sup>-BH<sub>3</sub>-NHMe<sub>2</sub>)] adduct to the linear diborazane**

| <b>B3LYP-GD3BJ/6-31G*+6-31++G**+LanL2DZ</b>             |                     |                         |                                     |                            |                        |                              |                        |                        |
|---------------------------------------------------------|---------------------|-------------------------|-------------------------------------|----------------------------|------------------------|------------------------------|------------------------|------------------------|
|                                                         | <b>E<br/>(a.u.)</b> | <b>E+ZPE<br/>(a.u.)</b> | <b>Gibbs free energy<br/>(a.u.)</b> | <b>Enthalpy<br/>(a.u.)</b> | <b>ΔE<br/>(kJ/mol)</b> | <b>Δ(E+ZPE)<br/>(kJ/mol)</b> | <b>ΔG<br/>(kJ/mol)</b> | <b>ΔH<br/>(kJ/mol)</b> |
| <b>Cp<sub>2</sub>Ti+2HNMe<sub>2</sub>BH<sub>3</sub></b> | -768.9180           | -768.4969               | -768.5909                           | -768.4721                  | 0.0                    | 0.0                          | 0.0                    | 0.0                    |
| <b>S<sub>6</sub></b>                                    | -768.9870           | -768.5593               | -768.6115                           | -768.5350                  | -181.0                 | -164.0                       | -54.1                  | -165.1                 |
| <b>TS<sub>6_7</sub></b>                                 | -768.9538           | -768.5323               | -768.5819                           | -768.5094                  | -93.9                  | -93.1                        | 23.5                   | -97.8                  |
| <b>S<sub>7</sub></b>                                    | -768.9582           | -768.5351               | -768.5859                           | -768.5119                  | -105.5                 | -100.5                       | 12.9                   | -104.6                 |
| <b>TS<sub>7_8</sub></b>                                 | -768.9549           | -768.5311               | -768.5793                           | -768.5090                  | -96.8                  | -90.0                        | 30.2                   | -96.8                  |
| <b>S<sub>8</sub></b>                                    | -768.9839           | -768.5614               | -768.6143                           | -768.5384                  | -172.9                 | -169.5                       | -61.4                  | -173.9                 |

| <b>B3LYP-GD3BJ-PCM(toluene)/6-31G*+6-31++G**+LanL2DZ</b> |                     |                         |                                     |                            |                        |                              |                        |                        |
|----------------------------------------------------------|---------------------|-------------------------|-------------------------------------|----------------------------|------------------------|------------------------------|------------------------|------------------------|
|                                                          | <b>E<br/>(a.u.)</b> | <b>E+ZPE<br/>(a.u.)</b> | <b>Gibbs free energy<br/>(a.u.)</b> | <b>Enthalpy<br/>(a.u.)</b> | <b>ΔE<br/>(kJ/mol)</b> | <b>Δ(E+ZPE)<br/>(kJ/mol)</b> | <b>ΔG<br/>(kJ/mol)</b> | <b>ΔH<br/>(kJ/mol)</b> |
| <b>Cp<sub>2</sub>Ti+2HNMe<sub>2</sub>BH<sub>3</sub></b>  | -768.9334           | -768.5125               | -768.6058                           | -768.4878                  | 0.0                    | 0.0                          | 0.0                    | 0.0                    |
| <b>S<sub>6</sub></b>                                     | -768.9955           | -768.5673               | -768.6190                           | -768.5431                  | -163.1                 | -143.8                       | -34.6                  | -145.3                 |
| <b>TS<sub>6_7</sub></b>                                  | -768.9610           | -768.5396               | -768.5893                           | -768.5165                  | -72.6                  | -71.1                        | 43.3                   | -75.5                  |
| <b>S<sub>7</sub></b>                                     | -768.9694           | -768.5462               | -768.5968                           | -768.5229                  | -94.5                  | -88.4                        | 23.6                   | -92.3                  |
| <b>TS<sub>7_8</sub></b>                                  | -768.9630           | -768.5396               | -768.5885                           | -768.5174                  | -77.9                  | -71.1                        | 45.6                   | -77.6                  |
| <b>S<sub>8</sub></b>                                     | -768.9906           | -768.5687               | -768.6220                           | -768.5455                  | -150.3                 | -147.5                       | -42.6                  | -151.6                 |

Path 3: From linear diborazane to cyclic diborazane

| B3LYP-GD3BJ/6-31G*+6-31++G**+LanL2DZ                                                     |             |                 |                             |                    |                        |                             |                        |                        |
|------------------------------------------------------------------------------------------|-------------|-----------------|-----------------------------|--------------------|------------------------|-----------------------------|------------------------|------------------------|
|                                                                                          | E<br>(a.u.) | E+ZPE<br>(a.u.) | Gibbs free energy<br>(a.u.) | Enthalpy<br>(a.u.) | $\Delta E$<br>(kJ/mol) | $\Delta(E+ZPE)$<br>(kJ/mol) | $\Delta G$<br>(kJ/mol) | $\Delta H$<br>(kJ/mol) |
| <b>Cp<sub>2</sub>Ti</b>                                                                  | -445.2026   | -445.0367       | -445.0751                   | -445.0256          |                        |                             |                        |                        |
| <b>HNMe<sub>2</sub>BH<sub>2</sub>NMe<sub>2</sub>BH<sub>3</sub></b>                       | -322.5568   | -322.3187       | -322.3538                   | -322.3069          |                        |                             |                        |                        |
| <b>Cp<sub>2</sub>Ti<br/>+HNMe<sub>2</sub>BH<sub>2</sub>NMe<sub>2</sub>BH<sub>3</sub></b> | -767.7595   | -767.3554       | -767.4289                   | -767.3325          | 0.0                    | 0.0                         | 0.0                    | 0.0                    |
| <b>S<sub>9</sub></b>                                                                     | -767.7952   | -767.3874       | -767.4382                   | -767.3648          | -93.9                  | -84.1                       | -24.5                  | -85.0                  |
| <b>TS<sub>9_10</sub></b>                                                                 | -767.7723   | -767.3714       | -767.4168                   | -767.3504          | -33.6                  | -42.0                       | 31.6                   | -47.2                  |
| <b>S<sub>10</sub></b>                                                                    | -767.8041   | -767.3994       | -767.4468                   | -767.3777          | -117.0                 | -115.5                      | -47.0                  | -118.8                 |
| <b>TS<sub>10_11</sub></b>                                                                | -767.7908   | -767.3874       | -767.4345                   | -767.3663          | -82.2                  | -84.0                       | -14.8                  | -88.8                  |
| <b>S<sub>11</sub></b>                                                                    | -767.8101   | -767.4060       | -767.4539                   | -767.3850          | -132.8                 | -133.0                      | -65.7                  | -138.0                 |

| B3LYP-GD3BJ-PCM(toluene)/6-31G*+6-31++G**+LanL2DZ                                        |             |                 |                             |                    |                        |                             |                        |                        |
|------------------------------------------------------------------------------------------|-------------|-----------------|-----------------------------|--------------------|------------------------|-----------------------------|------------------------|------------------------|
|                                                                                          | E<br>(a.u.) | E+ZPE<br>(a.u.) | Gibbs free energy<br>(a.u.) | Enthalpy<br>(a.u.) | $\Delta E$<br>(kJ/mol) | $\Delta(E+ZPE)$<br>(kJ/mol) | $\Delta G$<br>(kJ/mol) | $\Delta H$<br>(kJ/mol) |
| <b>Cp<sub>2</sub>Ti</b>                                                                  | -445.2057   | -445.0400       | -445.0776                   | -445.0289          |                        |                             |                        |                        |
| <b>HNMe<sub>2</sub>BH<sub>2</sub>NMe<sub>2</sub>BH<sub>3</sub></b>                       | -322.5622   | -322.3241       | -322.3593                   | -322.3123          |                        |                             |                        |                        |
| <b>Cp<sub>2</sub>Ti<br/>+HNMe<sub>2</sub>BH<sub>2</sub>NMe<sub>2</sub>BH<sub>3</sub></b> | -767.7679   | -767.3641       | -767.4369                   | -767.3412          | 0.0                    | 0.0                         | 0.0                    | 0.0                    |
| <b>S<sub>9</sub></b>                                                                     | -767.8009   | -767.3933       | -767.4411                   | -767.3716          | -86.5                  | -76.5                       | -11.0                  | -79.7                  |
| <b>TS<sub>9_10</sub></b>                                                                 | -767.7767   | -767.3760       | -767.4240                   | -767.3542          | -23.1                  | -31.2                       | 33.8                   | -34.1                  |
| <b>S<sub>10</sub></b>                                                                    | -767.8089   | -767.4045       | -767.4521                   | -767.3829          | -107.7                 | -106.0                      | -39.9                  | -109.3                 |
| <b>TS<sub>10_11</sub></b>                                                                | -767.7946   | -767.3914       | -767.4384                   | -767.3703          | -70.0                  | -71.6                       | -4.0                   | -76.5                  |
| <b>S<sub>11</sub></b>                                                                    | -767.8139   | -767.4096       | -767.4591                   | -767.3879          | -120.8                 | -119.5                      | -58.4                  | -122.5                 |

**Cartesian coordinates of the intermediates and transition states involved in the titanocene-catalyzed dehydrogenation of dimethylamine borane (DMAB)**

**Optimized at the B3LYP-GD3BJ/ 6-31G\*+6-31++G\*\*+LanL2DZ level of theory**

**Cp<sub>2</sub>Ti** **E = -445.2026464 Hartree**

|    |           |           |           |
|----|-----------|-----------|-----------|
| C  | 1.874602  | 1.153198  | 0.426824  |
| C  | 2.155639  | 0.723239  | -0.902267 |
| C  | 2.160472  | -0.688055 | -0.928003 |
| C  | 1.882032  | -1.168281 | 0.383409  |
| C  | 1.708280  | -0.024100 | 1.243191  |
| H  | 1.848437  | 2.179026  | 0.770003  |
| H  | 2.294268  | 1.368758  | -1.761329 |
| H  | 2.301340  | -1.300762 | -1.810452 |
| H  | 1.857229  | -2.206647 | 0.686854  |
| H  | 1.582157  | -0.044849 | 2.317091  |
| C  | -1.708282 | -0.023518 | 1.243200  |
| C  | -1.874375 | 1.153488  | 0.426354  |
| C  | -2.155519 | 0.722984  | -0.902576 |
| C  | -2.160582 | -0.688321 | -0.927712 |
| C  | -1.882267 | -1.168008 | 0.383888  |
| H  | -1.582160 | -0.043846 | 2.317108  |
| H  | -1.848166 | 2.179454  | 0.769112  |
| H  | -2.294107 | 1.368150  | -1.761908 |
| H  | -2.301486 | -1.301389 | -1.809905 |
| H  | -1.857514 | -2.206251 | 0.687762  |
| Ti | 0.000000  | 0.002391  | -0.140099 |

**HMe<sub>2</sub>NBH<sub>3</sub>** **E = -161.8576791 Hartree**

|   |           |           |           |
|---|-----------|-----------|-----------|
| B | -1.584780 | -0.000034 | 0.117553  |
| H | -2.055397 | 1.013548  | -0.355820 |
| H | -2.055357 | -1.013643 | -0.355802 |
| N | -0.004068 | -0.000004 | -0.341775 |
| H | -1.565867 | -0.000023 | 1.331517  |
| C | 0.704851  | -1.224345 | 0.102036  |
| C | 0.704793  | 1.224378  | 0.102014  |
| H | -0.018681 | -0.000012 | -1.361745 |
| H | 1.747857  | -1.217858 | -0.233640 |
| H | 0.182498  | -2.093980 | -0.297866 |
| H | 0.664663  | -1.259491 | 1.192652  |
| H | 1.747792  | 1.217948  | -0.233687 |
| H | 0.182382  | 2.093983  | -0.297879 |
| H | 0.664630  | 1.259528  | 1.192630  |

**HNMe<sub>2</sub>BH<sub>2</sub>NMe<sub>2</sub>BH<sub>3</sub>**

**E = -322.5568378 Hartree**

|   |           |           |           |
|---|-----------|-----------|-----------|
| B | -0.133806 | -0.523750 | -0.734973 |
| N | 1.202548  | -0.056826 | -0.009896 |
| H | -0.238878 | -0.035076 | -1.836875 |
| N | -1.424688 | -0.050502 | 0.132352  |
| H | -0.172130 | -1.726122 | -0.739955 |
| C | 1.694913  | 1.250599  | -0.515530 |
| B | 1.027572  | 0.020564  | 1.604404  |
| C | 2.246869  | -1.071853 | -0.319293 |
| H | 2.610373  | 1.524057  | 0.017728  |
| H | 1.892282  | 1.190784  | -1.591012 |
| H | 0.950043  | 2.025065  | -0.332841 |
| H | 1.967690  | -2.018792 | 0.142267  |
| H | 2.334934  | -1.207259 | -1.403983 |
| H | 3.205317  | -0.740992 | 0.090739  |
| H | -1.082530 | -0.079232 | 1.103351  |
| C | -1.881883 | 1.335176  | -0.137163 |
| C | -2.542199 | -1.015920 | -0.010164 |
| H | 2.124812  | 0.163555  | 2.097515  |
| H | 0.318811  | 0.987376  | 1.852958  |
| H | 0.500503  | -1.022398 | 1.959291  |
| H | -2.747754 | 1.576461  | 0.487380  |
| H | -1.073723 | 2.027237  | 0.093309  |
| H | -2.146951 | 1.417853  | -1.193129 |
| H | -3.410996 | -0.676371 | 0.562376  |
| H | -2.806462 | -1.095588 | -1.067633 |
| H | -2.212703 | -1.990361 | 0.349535  |

**S<sub>1</sub>**

**E = -607.0898753 Hartree**

|   |           |           |           |
|---|-----------|-----------|-----------|
| C | -2.106411 | -1.196661 | 1.048270  |
| C | -0.911452 | -1.982450 | 0.957768  |
| C | -0.739257 | -2.349036 | -0.395856 |
| C | -1.799605 | -1.804526 | -1.155894 |
| C | -2.667352 | -1.085672 | -0.273176 |
| H | -2.554864 | -0.830087 | 1.960541  |
| H | -0.275816 | -2.269837 | 1.785445  |
| H | 0.107636  | -2.882991 | -0.807203 |
| H | -1.913259 | -1.897945 | -2.228941 |
| H | -3.617008 | -0.638570 | -0.531844 |
| C | -1.891311 | 2.023377  | -0.026711 |
| C | -1.244358 | 1.709552  | 1.222889  |
| C | 0.176341  | 1.853272  | 1.035279  |
| C | 0.383174  | 2.258064  | -0.311551 |
| C | -0.862658 | 2.358199  | -0.958813 |



|    |           |           |           |
|----|-----------|-----------|-----------|
| H  | -2.956388 | 2.090329  | -0.198840 |
| H  | -1.739428 | 1.515777  | 2.163660  |
| H  | 0.926498  | 1.810450  | 1.816635  |
| H  | 1.340592  | 2.393136  | -0.797128 |
| H  | -1.004592 | 2.597613  | -2.005892 |
| Ti | -0.778378 | 0.089718  | -0.204069 |
| B  | 2.018166  | -0.378812 | -1.403673 |
| H  | 2.370171  | -1.431072 | -1.878966 |
| H  | 0.798870  | -0.404067 | -1.231050 |
| N  | 2.698245  | -0.238727 | 0.068098  |
| H  | 2.323936  | 0.589134  | -2.050800 |
| C  | 3.998569  | 0.472306  | 0.032080  |
| C  | 2.810134  | -1.543536 | 0.764971  |
| H  | 2.015827  | 0.321834  | 0.592159  |
| H  | 4.435759  | 0.528814  | 1.034337  |
| H  | 3.842152  | 1.475113  | -0.366464 |
| H  | 4.672172  | -0.071321 | -0.634954 |
| H  | 3.178422  | -1.402144 | 1.786601  |
| H  | 1.822588  | -2.001517 | 0.785077  |
| H  | 3.497633  | -2.178617 | 0.203302  |

**TS<sub>1,2</sub>**

**E = -607.0797969 Hartree**

|    |           |           |           |
|----|-----------|-----------|-----------|
| C  | -1.566525 | 1.600611  | -1.164796 |
| C  | -0.252277 | 2.083602  | -0.966493 |
| C  | -0.081797 | 2.271320  | 0.439428  |
| C  | -1.299065 | 1.919563  | 1.096254  |
| C  | -2.210536 | 1.517481  | 0.097152  |
| H  | -1.998199 | 1.317777  | -2.115634 |
| H  | 0.458786  | 2.313511  | -1.746973 |
| H  | 0.792454  | 2.652639  | 0.944889  |
| H  | -1.489147 | 1.969180  | 2.158822  |
| H  | -3.218318 | 1.164848  | 0.266249  |
| C  | -2.210445 | -1.517577 | 0.097050  |
| C  | -1.566329 | -1.600762 | -1.164841 |
| C  | -0.252076 | -2.083677 | -0.966401 |
| C  | -0.081696 | -2.271301 | 0.439550  |
| C  | -1.299036 | -1.919548 | 1.096263  |
| H  | -3.218259 | -1.164980 | 0.266033  |
| H  | -1.997935 | -1.318007 | -2.115733 |
| H  | 0.459062  | -2.313592 | -1.746810 |
| H  | 0.792538  | -2.652542 | 0.945102  |
| H  | -1.489213 | -1.969125 | 2.158815  |
| Ti | -0.337724 | -0.000005 | 0.157025  |
| B  | 1.803342  | 0.000077  | 1.557600  |
| H  | 2.242152  | 1.013833  | 2.035446  |

|   |          |           |           |
|---|----------|-----------|-----------|
| H | 0.554451 | 0.000053  | 1.809343  |
| N | 2.121527 | 0.000054  | -0.034149 |
| H | 2.242194 | -1.013654 | 2.035462  |
| C | 2.887579 | -1.197374 | -0.470637 |
| C | 2.887521 | 1.197497  | -0.470698 |
| H | 1.204931 | 0.000021  | -0.820405 |
| H | 2.977229 | -1.201258 | -1.563106 |
| H | 2.389227 | -2.102668 | -0.142843 |
| H | 3.881211 | -1.156530 | -0.018490 |
| H | 2.977178 | 1.201323  | -1.563167 |
| H | 2.389119 | 2.102784  | -0.142963 |
| H | 3.881151 | 1.156731  | -0.018541 |

**S<sub>2</sub>**

**E = -607.1271044 Hartree**

|    |           |           |           |
|----|-----------|-----------|-----------|
| C  | 1.944460  | -1.305114 | -0.958769 |
| C  | 0.746715  | -2.063103 | -1.064260 |
| C  | 0.318666  | -2.362344 | 0.248315  |
| C  | 1.256459  | -1.813246 | 1.165462  |
| C  | 2.269314  | -1.185400 | 0.419284  |
| H  | 2.505079  | -0.892889 | -1.786482 |
| H  | 0.254080  | -2.346386 | -1.982325 |
| H  | -0.559735 | -2.915621 | 0.536373  |
| H  | 1.185441  | -1.861619 | 2.242747  |
| H  | 3.118948  | -0.660884 | 0.832123  |
| C  | 1.967548  | 1.656205  | -0.163754 |
| C  | 1.062389  | 1.928195  | -1.211397 |
| C  | -0.172772 | 2.315652  | -0.626702 |
| C  | -0.036268 | 2.251234  | 0.774730  |
| C  | 1.284039  | 1.810284  | 1.068378  |
| H  | 2.993102  | 1.341479  | -0.288465 |
| H  | 1.265721  | 1.858498  | -2.270538 |
| H  | -1.060530 | 2.578696  | -1.178912 |
| H  | -0.808123 | 2.437604  | 1.507278  |
| H  | 1.693555  | 1.648717  | 2.056020  |
| Ti | 0.206568  | 0.010742  | -0.020946 |
| B  | -1.771014 | -0.383272 | 1.552054  |
| H  | -1.902103 | -1.511461 | 1.956597  |
| H  | -0.508227 | -0.125839 | 1.688153  |
| N  | -2.046204 | -0.228254 | 0.047926  |
| H  | -2.286673 | 0.474823  | 2.228245  |
| C  | -2.891441 | 0.927534  | -0.296599 |
| C  | -2.616978 | -1.379735 | -0.669145 |
| H  | -0.365096 | -0.061648 | -1.574790 |
| H  | -2.830476 | 1.140079  | -1.370547 |
| H  | -2.597203 | 1.809088  | 0.266980  |

|   |           |           |           |
|---|-----------|-----------|-----------|
| H | -3.937587 | 0.704388  | -0.041671 |
| H | -2.550984 | -1.213340 | -1.750582 |
| H | -2.094532 | -2.299003 | -0.426943 |
| H | -3.673434 | -1.507831 | -0.391471 |

**S<sub>4</sub>** **E = -768.9914829 Hartree**

|    |           |           |           |
|----|-----------|-----------|-----------|
| C  | 0.006834  | 0.084823  | 0.334484  |
| C  | 0.114856  | 0.239549  | 1.741461  |
| C  | 1.488308  | 0.231283  | 2.069153  |
| C  | 2.235619  | 0.136466  | 0.866606  |
| C  | 1.307477  | 0.016742  | -0.205313 |
| H  | -0.927987 | 0.066831  | -0.200158 |
| H  | -0.719117 | 0.348155  | 2.419764  |
| H  | 1.896665  | 0.328460  | 3.064541  |
| H  | 3.313438  | 0.135944  | 0.777028  |
| H  | 1.568050  | -0.046315 | -1.252240 |
| C  | 0.800665  | 4.159404  | 2.066154  |
| C  | 1.350089  | 3.153250  | 2.905916  |
| C  | 2.671779  | 2.881004  | 2.461108  |
| C  | 2.924210  | 3.670859  | 1.325477  |
| C  | 1.770049  | 4.466146  | 1.084594  |
| H  | -0.182922 | 4.595319  | 2.159165  |
| H  | 0.841538  | 2.676293  | 3.732452  |
| H  | 3.349922  | 2.152912  | 2.882906  |
| H  | 3.821768  | 3.665623  | 0.723412  |
| H  | 1.679239  | 5.177508  | 0.280418  |
| C  | -5.786499 | 1.131710  | -0.061585 |
| H  | -5.543386 | 2.051538  | -0.597579 |
| H  | -6.872699 | 1.037207  | 0.044788  |
| H  | -5.385259 | 0.283648  | -0.617504 |
| C  | -5.689742 | 2.269803  | 2.106596  |
| H  | -5.452569 | 3.223539  | 1.630842  |
| H  | -6.775162 | 2.162446  | 2.208964  |
| H  | -5.211284 | 2.236850  | 3.086027  |
| C  | -0.784566 | 2.000412  | -1.898391 |
| H  | -0.289011 | 1.051085  | -2.086599 |
| H  | -1.032941 | 2.442258  | -2.875246 |
| H  | -1.710048 | 1.832075  | -1.338192 |
| C  | -0.617264 | 4.200277  | -1.082764 |
| H  | -0.861853 | 4.556609  | -2.094981 |
| H  | -1.545978 | 4.065233  | -0.517001 |
| H  | -0.019463 | 4.963738  | -0.595725 |
| Ti | 1.097861  | 2.199066  | 0.744048  |
| B  | 1.554516  | 2.931405  | -1.665641 |

|   |           |          |           |
|---|-----------|----------|-----------|
| H | 1.748013  | 2.185105 | -2.597180 |
| H | 2.017712  | 4.039126 | -1.788961 |
| H | 2.243737  | 2.381100 | -0.718177 |
| N | 0.102287  | 2.919306 | -1.162368 |
| B | -3.490606 | 1.306656 | 1.131015  |
| H | -3.068719 | 1.270227 | 2.267731  |
| H | -3.290020 | 2.367360 | 0.580279  |
| H | -3.155462 | 0.348710 | 0.465241  |
| H | -0.489595 | 2.500689 | 1.059967  |
| N | -5.124487 | 1.187024 | 1.264854  |
| H | -5.299273 | 0.300223 | 1.737961  |

**S<sub>5</sub>**

**E = -769.0003728 Hartree**

|   |           |           |           |
|---|-----------|-----------|-----------|
| C | 0.003423  | 0.020152  | -0.015680 |
| C | 0.012817  | -0.000411 | 1.410127  |
| C | 1.366384  | -0.004379 | 1.827717  |
| C | 2.191707  | 0.034709  | 0.668065  |
| C | 1.351108  | 0.069640  | -0.461415 |
| H | -0.880487 | 0.035512  | -0.636728 |
| H | -0.854480 | 0.008604  | 2.052959  |
| H | 1.712460  | -0.041365 | 2.851389  |
| H | 3.272679  | 0.023361  | 0.650354  |
| H | 1.688405  | 0.060006  | -1.486172 |
| C | 2.713230  | -3.612888 | 0.602184  |
| C | 1.472591  | -4.292431 | 0.795756  |
| C | 0.971346  | -3.936058 | 2.073450  |
| C | 1.877366  | -3.010506 | 2.650167  |
| C | 2.958335  | -2.829782 | 1.747344  |
| H | 3.331263  | -3.665382 | -0.281923 |
| H | 3.800772  | -2.167524 | 1.893783  |
| H | 1.752396  | -2.518782 | 3.605404  |
| H | 0.053544  | -4.286501 | 2.522256  |
| H | 1.016064  | -4.975712 | 0.096160  |
| C | 1.504278  | -2.833316 | -4.778387 |
| H | 2.292831  | -2.080394 | -4.865046 |
| H | 1.956372  | -3.824721 | -4.738676 |
| H | 0.834193  | -2.773027 | -5.642956 |
| C | 0.211169  | -1.215214 | -3.561090 |
| H | 1.043320  | -0.509852 | -3.646899 |
| H | -0.324290 | -1.002338 | -2.635921 |
| H | -0.464554 | -1.090692 | -4.413663 |
| C | -1.415157 | -5.067369 | -1.610819 |
| H | -0.443965 | -5.555053 | -1.541093 |
| H | -2.043854 | -5.622927 | -2.311034 |
| H | -1.889166 | -5.031047 | -0.625347 |

|    |           |           |           |
|----|-----------|-----------|-----------|
| C  | -2.512620 | -2.960636 | -2.140367 |
| H  | -2.354607 | -1.949735 | -2.515306 |
| H  | -2.920501 | -2.911132 | -1.126591 |
| H  | -3.204909 | -3.480668 | -2.805736 |
| Ti | 0.968415  | -2.015571 | 0.669281  |
| H  | -0.447686 | -2.217087 | 1.484006  |
| H  | -0.485201 | -2.553839 | -0.034632 |
| B  | 1.766003  | -2.783766 | -2.301155 |
| N  | 0.734954  | -2.602747 | -3.523508 |
| B  | -0.437333 | -3.679646 | -3.535689 |
| N  | -1.217677 | -3.687486 | -2.122626 |
| H  | 2.712686  | -2.050078 | -2.474407 |
| H  | 1.171573  | -2.421777 | -1.264751 |
| H  | 2.048141  | -3.952101 | -2.216315 |
| H  | 0.052013  | -4.765532 | -3.694386 |
| H  | -1.239276 | -3.389990 | -4.396120 |
| H  | -0.650589 | -3.205062 | -1.382985 |

**S<sub>6</sub>**

**E = -768.9869567 Hartree**

|   |           |           |           |
|---|-----------|-----------|-----------|
| C | -0.147010 | -0.077641 | 0.001619  |
| C | -0.146313 | -0.063576 | 1.413839  |
| C | 1.194720  | 0.035924  | 1.864683  |
| C | 2.022184  | 0.105290  | 0.698330  |
| C | 1.192391  | 0.010036  | -0.464215 |
| C | 2.139825  | -4.022556 | -0.278365 |
| C | 1.969971  | -4.223362 | 1.110381  |
| C | 2.757468  | -3.264278 | 1.814788  |
| C | 3.415298  | -2.472262 | 0.819880  |
| C | 3.017021  | -2.934231 | -0.473330 |
| H | 2.957674  | -3.249702 | 2.876269  |
| H | 1.316955  | -4.959288 | 1.560021  |
| H | 1.610631  | -4.554219 | -1.058659 |
| H | 3.335060  | -2.532355 | -1.425391 |
| H | 4.138438  | -1.694471 | 1.016569  |
| H | 1.508557  | 0.086136  | -1.494621 |
| H | 3.088437  | 0.274483  | 0.692403  |
| H | 1.503923  | 0.168961  | 2.891134  |
| H | -0.998662 | -0.150134 | 2.077573  |
| H | 1.218877  | -4.304435 | 4.256036  |
| C | -3.170723 | -3.060762 | 1.648876  |
| C | -2.923071 | -2.555081 | -0.745597 |
| H | -2.269506 | -2.068617 | -1.470459 |
| H | -3.898241 | -2.059785 | -0.720495 |
| H | -3.046218 | -3.604086 | -1.023395 |
| H | -2.687865 | -2.922637 | 2.617053  |

|    |           |           |           |
|----|-----------|-----------|-----------|
| H  | -4.134310 | -2.542675 | 1.640226  |
| H  | -3.314117 | -4.123724 | 1.445671  |
| C  | 1.652485  | -1.868892 | 5.226552  |
| C  | 0.297890  | -3.754806 | 4.473885  |
| H  | 1.832741  | -0.805595 | 5.065907  |
| H  | 2.556312  | -2.439489 | 4.989264  |
| H  | 1.377252  | -2.025717 | 6.272347  |
| H  | -0.471066 | -4.039028 | 3.754863  |
| H  | -0.049030 | -3.984907 | 5.483720  |
| H  | -1.015955 | -0.169726 | -0.640441 |
| Ti | 1.188951  | -2.001513 | 0.693906  |
| B  | -0.839197 | -3.211197 | 0.585405  |
| N  | -2.281456 | -2.501208 | 0.593428  |
| H  | -0.294909 | -2.877125 | 1.658028  |
| H  | -0.243790 | -2.795525 | -0.426285 |
| H  | -1.017139 | -4.397894 | 0.521491  |
| H  | -2.107703 | -1.521855 | 0.824274  |
| N  | 0.521774  | -2.295119 | 4.372124  |
| H  | 0.786730  | -2.103271 | 3.384240  |
| B  | -0.825564 | -1.448825 | 4.699078  |
| H  | -1.657555 | -1.796524 | 3.881846  |
| H  | -0.541604 | -0.275675 | 4.584249  |
| H  | -1.151590 | -1.748005 | 5.830936  |

**TS<sub>6\_7</sub>**

**E = -768.95377 Hartree**

|   |           |           |           |
|---|-----------|-----------|-----------|
| C | -2.140605 | -0.097352 | 1.922682  |
| C | -0.838129 | 0.412350  | 2.152176  |
| C | 0.065408  | -0.682967 | 2.069416  |
| C | -0.686154 | -1.859727 | 1.821307  |
| C | -2.045147 | -1.501783 | 1.702533  |
| H | -3.053996 | 0.478355  | 1.943802  |
| H | -0.581408 | 1.427789  | 2.399341  |
| H | 1.137386  | -0.596562 | 2.176353  |
| H | -0.294494 | -2.857444 | 1.675506  |
| H | -2.864445 | -2.174235 | 1.488953  |
| C | -1.757952 | -0.884053 | -2.247770 |
| C | -2.840480 | -0.822201 | -1.342217 |
| C | -2.921052 | 0.516212  | -0.860068 |
| C | -1.875562 | 1.274062  | -1.453218 |
| C | -1.157762 | 0.397777  | -2.309434 |
| H | -1.401943 | -1.771760 | -2.752824 |
| H | -3.492129 | -1.640573 | -1.069176 |
| H | -3.668471 | 0.898551  | -0.180907 |
| H | -1.686671 | 2.327059  | -1.316206 |
| H | -0.276830 | 0.655885  | -2.878748 |

|    |           |           |           |
|----|-----------|-----------|-----------|
| Ti | -0.916191 | -0.358775 | -0.058948 |
| B  | 1.104175  | -1.216289 | -1.067877 |
| H  | 1.218272  | -1.365286 | -2.250565 |
| H  | 0.214876  | -1.960506 | -0.625247 |
| N  | 2.510817  | -1.467262 | -0.346261 |
| H  | 0.824999  | -0.043522 | -0.783176 |
| C  | 3.630152  | -1.474842 | -1.328644 |
| C  | 2.580304  | -2.662999 | 0.526758  |
| H  | 2.644397  | -0.605894 | 0.229438  |
| H  | 4.584808  | -1.519557 | -0.796223 |
| H  | 3.582473  | -0.556539 | -1.911338 |
| H  | 3.520577  | -2.342764 | -1.983216 |
| H  | 3.574894  | -2.739324 | 0.975814  |
| H  | 1.833974  | -2.582715 | 1.313217  |
| H  | 2.379741  | -3.554719 | -0.072787 |
| B  | 2.619580  | 1.663023  | 0.271338  |
| H  | 3.519343  | 2.448257  | 0.550386  |
| H  | 2.631275  | 0.755008  | 1.129323  |
| N  | 1.230576  | 2.371074  | 0.280695  |
| H  | 2.820454  | 1.195446  | -0.840678 |
| C  | 1.034863  | 3.197533  | -0.901959 |
| C  | 1.020089  | 3.165648  | 1.481811  |
| H  | -0.088602 | 1.206318  | 0.156997  |
| H  | 0.063486  | 3.712317  | -0.865026 |
| H  | 1.067336  | 2.570020  | -1.797726 |
| H  | 1.821171  | 3.968234  | -1.000953 |
| H  | -0.020348 | 3.522071  | 1.545218  |
| H  | 1.245519  | 2.564193  | 2.367685  |
| H  | 1.684215  | 4.048642  | 1.511043  |

**S<sub>7</sub>** **E = -768.9581845 Hartree**

|   |           |           |           |
|---|-----------|-----------|-----------|
| C | 2.832454  | -1.073118 | -1.328723 |
| C | 1.638456  | -1.045998 | -2.087908 |
| C | 0.671480  | -1.820209 | -1.392944 |
| C | 1.277613  | -2.338101 | -0.220143 |
| C | 2.605276  | -1.857894 | -0.162389 |
| H | 3.762262  | -0.593743 | -1.595833 |
| H | 1.490006  | -0.549944 | -3.035349 |
| H | -0.343882 | -1.976021 | -1.718087 |
| H | 0.803028  | -2.957736 | 0.527376  |
| H | 3.324215  | -2.067362 | 0.617116  |
| C | 1.702118  | 1.293826  | 1.935046  |
| C | 2.925600  | 0.882759  | 1.360387  |
| C | 3.045559  | 1.520884  | 0.092882  |
| C | 1.888529  | 2.310091  | -0.119991 |

|    |           |           |           |
|----|-----------|-----------|-----------|
| C  | 1.050997  | 2.156873  | 1.016858  |
| H  | 1.302929  | 0.966708  | 2.884728  |
| H  | 3.646223  | 0.211601  | 1.806491  |
| H  | 3.880460  | 1.432316  | -0.586335 |
| H  | 1.686379  | 2.934307  | -0.977551 |
| H  | 0.079546  | 2.607849  | 1.144813  |
| Ti | 1.208265  | 0.047660  | -0.039183 |
| B  | -0.933551 | -0.090160 | 0.974971  |
| H  | -1.157873 | 0.809418  | 1.722711  |
| H  | 0.142541  | -0.684332 | 1.347139  |
| N  | -2.134744 | -1.087958 | 1.102802  |
| H  | -0.671374 | 0.275868  | -0.200876 |
| C  | -2.262084 | -1.595071 | 2.492825  |
| C  | -2.264569 | -2.188553 | 0.121609  |
| H  | -2.969170 | -0.458542 | 0.938632  |
| H  | -3.201653 | -2.144752 | 2.595396  |
| H  | -2.259921 | -0.746909 | 3.178759  |
| H  | -1.419723 | -2.254038 | 2.721852  |
| H  | -3.215062 | -2.701940 | 0.281818  |
| H  | -2.268804 | -1.755547 | -0.875092 |
| H  | -1.438201 | -2.892090 | 0.242163  |
| B  | -4.201881 | 0.570161  | -0.262199 |
| H  | -5.111649 | 1.346429  | -0.533434 |
| H  | -4.446997 | -0.548950 | -0.699938 |
| N  | -2.816991 | 1.039603  | -0.784303 |
| H  | -4.141355 | 0.518511  | 0.989998  |
| C  | -2.494960 | 2.411790  | -0.448417 |
| C  | -2.560295 | 0.795250  | -2.187251 |
| H  | 0.641196  | 0.871994  | -1.352037 |
| H  | -1.444288 | 2.640226  | -0.693048 |
| H  | -2.647583 | 2.577931  | 0.623418  |
| H  | -3.130574 | 3.136515  | -0.993783 |
| H  | -1.495712 | 0.962971  | -2.427854 |
| H  | -2.817821 | -0.238542 | -2.443894 |
| H  | -3.156708 | 1.452613  | -2.851671 |

TS<sub>7\_8</sub>

E = -768.9548676 Hartree

|   |           |           |           |
|---|-----------|-----------|-----------|
| C | 2.820557  | -1.182201 | -1.240959 |
| C | 1.639455  | -1.247298 | -2.015624 |
| C | 0.659290  | -1.927769 | -1.246710 |
| C | 1.247527  | -2.303218 | -0.007526 |
| C | 2.576893  | -1.828583 | 0.003126  |
| H | 3.749405  | -0.723031 | -1.546240 |
| H | 1.506736  | -0.862951 | -3.015597 |
| H | -0.349674 | -2.127060 | -1.569797 |



|    |           |           |           |
|----|-----------|-----------|-----------|
| H  | 0.770351  | -2.841903 | 0.798075  |
| H  | 3.285201  | -1.941907 | 0.811409  |
| C  | 1.492725  | 1.451396  | 1.820886  |
| C  | 2.750318  | 0.935142  | 1.435740  |
| C  | 3.065663  | 1.466989  | 0.152900  |
| C  | 1.996228  | 2.296509  | -0.259206 |
| C  | 1.016756  | 2.275650  | 0.769657  |
| H  | 0.964758  | 1.226728  | 2.736450  |
| H  | 3.368084  | 0.264983  | 2.017060  |
| H  | 3.968222  | 1.274202  | -0.408432 |
| H  | 1.938262  | 2.856361  | -1.180687 |
| H  | 0.071198  | 2.793499  | 0.749200  |
| Ti | 1.165291  | 0.077306  | -0.104918 |
| B  | -1.160196 | 0.119669  | 0.617726  |
| H  | -1.316507 | 1.051014  | 1.336122  |
| H  | 0.037067  | -0.431333 | 1.161731  |
| N  | -2.150915 | -1.029549 | 1.092955  |
| H  | -0.606660 | 0.248651  | -0.519655 |
| C  | -1.960292 | -1.346053 | 2.531848  |
| C  | -2.270667 | -2.271292 | 0.293608  |
| H  | -3.071075 | -0.544105 | 1.011671  |
| H  | -2.760108 | -2.011373 | 2.869346  |
| H  | -1.990243 | -0.416045 | 3.100446  |
| H  | -0.989831 | -1.827228 | 2.671783  |
| H  | -3.132308 | -2.843679 | 0.647040  |
| H  | -2.430309 | -2.007434 | -0.748455 |
| H  | -1.364940 | -2.866637 | 0.402495  |
| B  | -4.139329 | 0.638220  | -0.133893 |
| H  | -4.984886 | 1.363683  | -0.628118 |
| H  | -4.416243 | -0.536443 | -0.359698 |
| N  | -2.708911 | 0.942880  | -0.721257 |
| H  | -4.093455 | 0.835421  | 1.086136  |
| C  | -2.399325 | 2.371059  | -0.672860 |
| C  | -2.552460 | 0.484040  | -2.101023 |
| H  | 0.748457  | 0.816291  | -1.533837 |
| H  | -1.368412 | 2.552389  | -1.007783 |
| H  | -2.516352 | 2.738333  | 0.349934  |
| H  | -3.081148 | 2.941486  | -1.322289 |
| H  | -1.514537 | 0.614917  | -2.439965 |
| H  | -2.824518 | -0.571933 | -2.182615 |
| H  | -3.212532 | 1.045379  | -2.781720 |

**S<sub>8</sub>**

**E = -768.9838718 Hartree**

|   |           |           |          |
|---|-----------|-----------|----------|
| C | -4.043922 | -0.779105 | 1.130758 |
| C | -3.148884 | -1.859681 | 0.901161 |

|    |           |           |           |
|----|-----------|-----------|-----------|
| C  | -3.006363 | -2.015006 | -0.503549 |
| C  | -3.812920 | -1.028022 | -1.134406 |
| C  | -4.462747 | -0.278042 | -0.124723 |
| H  | -4.334617 | -0.390788 | 2.098759  |
| H  | -2.670523 | -2.459497 | 1.660669  |
| H  | -2.402424 | -2.756467 | -1.004648 |
| H  | -3.899065 | -0.865213 | -2.201276 |
| H  | -5.132604 | 0.555483  | -0.284358 |
| C  | -1.786120 | 1.957784  | -1.295196 |
| C  | -2.688698 | 2.351145  | -0.277357 |
| C  | -2.018193 | 2.246608  | 0.965071  |
| C  | -0.688061 | 1.809496  | 0.715581  |
| C  | -0.542794 | 1.631376  | -0.686440 |
| H  | -2.010407 | 1.895865  | -2.352670 |
| H  | -3.719563 | 2.644348  | -0.420422 |
| H  | -2.451312 | 2.441539  | 1.938139  |
| H  | 0.084317  | 1.647733  | 1.451814  |
| H  | 0.360022  | 1.318407  | -1.188453 |
| Ti | -2.103975 | 0.065310  | 0.074196  |
| B  | 2.841243  | 0.165986  | -0.215085 |
| H  | 2.581198  | 0.503579  | -1.340509 |
| H  | -0.922370 | -0.775138 | -0.764665 |
| N  | 2.537514  | -1.422323 | -0.092687 |
| H  | 2.190839  | 0.746850  | 0.621098  |
| C  | 1.892907  | -1.978681 | -1.312276 |
| C  | 1.784884  | -1.807709 | 1.128769  |
| H  | 3.483333  | -1.836559 | -0.047349 |
| H  | 1.774388  | -3.062462 | -1.207163 |
| H  | 2.528824  | -1.754076 | -2.168348 |
| H  | 0.913092  | -1.512112 | -1.433173 |
| H  | 1.714054  | -2.898635 | 1.195499  |
| H  | 2.303935  | -1.420754 | 2.006651  |
| H  | 0.784627  | -1.372632 | 1.080354  |
| B  | 5.311796  | -0.753868 | -0.653859 |
| H  | 6.472972  | -0.426229 | -0.531910 |
| H  | 5.124741  | -1.807061 | -0.042073 |
| N  | 4.393642  | 0.387632  | 0.048680  |
| H  | 4.961470  | -0.848712 | -1.812657 |
| C  | 4.750658  | 1.708246  | -0.529677 |
| C  | 4.697537  | 0.427346  | 1.501562  |
| H  | -1.147717 | -0.513133 | 1.327192  |
| H  | 4.093504  | 2.487989  | -0.125357 |
| H  | 4.634888  | 1.661303  | -1.612617 |
| H  | 5.792170  | 1.941765  | -0.289889 |
| H  | 4.137804  | 1.234650  | 1.986162  |
| H  | 4.422877  | -0.524760 | 1.960115  |

|   |          |          |          |
|---|----------|----------|----------|
| H | 5.771994 | 0.575612 | 1.645877 |
|---|----------|----------|----------|

**S<sub>9</sub>** **E = -767.7952438 Hartree**

|    |           |           |           |
|----|-----------|-----------|-----------|
| C  | 0.083855  | 0.079906  | 0.055569  |
| C  | -0.003579 | -0.024026 | 1.458338  |
| C  | 1.303663  | -0.107632 | 2.000517  |
| C  | 2.220889  | -0.041542 | 0.898764  |
| C  | 1.459287  | 0.069764  | -0.317832 |
| H  | -0.760790 | 0.092317  | -0.622898 |
| H  | -0.928259 | -0.096581 | 2.012930  |
| H  | 1.562398  | -0.125564 | 3.050320  |
| H  | 3.297236  | 0.006457  | 0.978466  |
| H  | 1.855191  | 0.208827  | -1.314045 |
| C  | 1.469136  | -3.972783 | -0.613085 |
| C  | 1.672030  | -4.361360 | 0.730990  |
| C  | 2.758077  | -3.626363 | 1.257663  |
| C  | 3.243712  | -2.769321 | 0.219599  |
| C  | 2.444640  | -2.984608 | -0.956161 |
| H  | 0.671043  | -4.332762 | -1.250318 |
| H  | 1.034409  | -5.043672 | 1.276969  |
| H  | 3.176733  | -3.719752 | 2.250663  |
| H  | 4.110805  | -2.128263 | 0.286671  |
| H  | 2.615051  | -2.560170 | -1.935736 |
| C  | -3.189151 | -4.450909 | 2.451479  |
| C  | -2.658081 | -2.245420 | 3.206883  |
| H  | -3.890554 | -4.032119 | 1.723417  |
| H  | -2.792206 | -5.389976 | 2.067951  |
| H  | -3.704353 | -4.630337 | 3.401510  |
| H  | -3.479553 | -1.917791 | 2.563980  |
| H  | -3.025465 | -2.417382 | 4.224306  |
| H  | -1.911382 | -1.454201 | 3.216628  |
| C  | 0.263994  | -2.269907 | 4.835074  |
| C  | 1.343670  | -4.392581 | 4.376027  |
| H  | -0.371318 | -1.490661 | 4.422602  |
| H  | 1.267258  | -1.861207 | 4.984694  |
| H  | -0.147672 | -2.612797 | 5.786642  |
| H  | 2.286264  | -3.875131 | 4.574199  |
| H  | 0.978169  | -4.860457 | 5.293596  |
| H  | 1.491013  | -5.158478 | 3.617091  |
| Ti | 1.165382  | -1.977208 | 0.576058  |
| B  | -1.408696 | -3.203871 | 1.209145  |
| N  | -2.065411 | -3.491303 | 2.655783  |
| B  | -1.069044 | -4.214904 | 3.662880  |
| N  | 0.324388  | -3.420678 | 3.897830  |
| H  | -2.125978 | -2.446909 | 0.596911  |

|   |           |           |          |
|---|-----------|-----------|----------|
| H | -0.331445 | -2.647591 | 1.505713 |
| H | -1.224973 | -4.256728 | 0.662609 |
| H | -0.767381 | -5.272309 | 3.176040 |
| H | 0.653671  | -3.045038 | 2.980244 |
| H | -1.589060 | -4.318355 | 4.752979 |

**TS<sub>9\_10</sub>**

**E = -767.7722859 Hartree**

|    |           |           |           |
|----|-----------|-----------|-----------|
| C  | -0.034745 | 0.022686  | 0.084940  |
| C  | 0.056467  | -0.006437 | 1.508222  |
| C  | 1.438512  | -0.021955 | 1.836895  |
| C  | 2.189678  | 0.027914  | 0.633479  |
| C  | 1.284569  | 0.046802  | -0.448448 |
| H  | -0.944385 | 0.029052  | -0.498390 |
| H  | -0.762391 | 0.044458  | 2.206047  |
| H  | 1.849361  | -0.079352 | 2.836699  |
| H  | 3.267855  | -0.013723 | 0.556615  |
| H  | 1.547798  | 0.042817  | -1.498719 |
| C  | 1.821729  | -4.027076 | -0.127109 |
| C  | 1.147133  | -4.343393 | 1.076877  |
| C  | 1.782021  | -3.650711 | 2.135820  |
| C  | 2.847391  | -2.891670 | 1.577300  |
| C  | 2.874009  | -3.123519 | 0.169624  |
| H  | 1.524182  | -4.359370 | -1.113601 |
| H  | 0.250937  | -4.942911 | 1.150013  |
| H  | 1.507798  | -3.689252 | 3.178801  |
| H  | 3.525819  | -2.253840 | 2.127418  |
| H  | 3.576170  | -2.700370 | -0.535878 |
| C  | -3.721199 | -4.109930 | -0.631326 |
| C  | -3.413726 | -1.826805 | 0.022641  |
| H  | -4.693699 | -4.095489 | -0.129724 |
| H  | -3.836853 | -3.811366 | -1.678768 |
| H  | -3.308054 | -5.117520 | -0.584378 |
| H  | -2.701565 | -1.087289 | 0.386135  |
| H  | -4.308590 | -1.813574 | 0.653599  |
| H  | -3.682723 | -1.567773 | -1.006429 |
| C  | -2.410303 | -1.767882 | 3.165648  |
| C  | -1.226662 | -3.765941 | 3.609693  |
| H  | -3.276110 | -2.101528 | 3.758888  |
| H  | -2.768774 | -1.060836 | 2.418744  |
| H  | -1.716447 | -1.241467 | 3.834015  |
| H  | -0.542708 | -3.197040 | 4.253531  |
| H  | -0.697531 | -4.620933 | 3.190709  |
| H  | -2.048072 | -4.148703 | 4.236360  |
| Ti | 0.916668  | -1.999245 | 0.654009  |
| H  | -0.662369 | -2.474261 | -0.105599 |

|   |           |           |           |
|---|-----------|-----------|-----------|
| B | -1.451556 | -3.165564 | -0.786454 |
| H | -1.595308 | -2.546361 | -1.818863 |
| H | -1.027899 | -4.279310 | -0.924150 |
| N | -2.789858 | -3.171824 | 0.055503  |
| B | -2.628360 | -3.754647 | 1.566890  |
| H | -2.130573 | -4.848619 | 1.434948  |
| H | -3.761697 | -3.817431 | 2.022061  |
| N | -1.738371 | -2.908224 | 2.534896  |
| H | -0.432798 | -2.353413 | 1.864776  |

**S<sub>10</sub>**

**E = -767.8040513 Hartree**

|   |           |           |           |
|---|-----------|-----------|-----------|
| C | 0.000754  | 0.038694  | 0.000486  |
| C | 0.000432  | 0.041102  | 1.421646  |
| C | 1.352560  | 0.046441  | 1.857554  |
| C | 2.179201  | 0.016918  | 0.705851  |
| C | 1.340424  | 0.005243  | -0.444354 |
| H | -0.872152 | 0.014533  | -0.635225 |
| H | -0.859472 | -0.049748 | 2.079039  |
| H | 1.683989  | 0.089543  | 2.883948  |
| H | 3.259513  | 0.022906  | 0.703640  |
| H | 1.671107  | -0.022940 | -1.473396 |
| C | 1.260092  | -3.967438 | -0.548996 |
| C | 1.544232  | -4.288502 | 0.799749  |
| C | 2.688191  | -3.546485 | 1.202077  |
| C | 3.088570  | -2.749083 | 0.102703  |
| C | 2.193157  | -2.994428 | -0.977590 |
| H | 0.429656  | -4.348519 | -1.125940 |
| H | 0.973111  | -4.955883 | 1.427858  |
| H | 3.172679  | -3.599452 | 2.165793  |
| H | 3.933543  | -2.077006 | 0.082860  |
| H | 2.233536  | -2.538120 | -1.956693 |
| C | -3.594872 | -3.580186 | 0.835205  |
| C | -3.091016 | -1.249255 | 0.613540  |
| H | -3.442225 | -3.787340 | -0.231062 |
| H | -3.391927 | -4.482197 | 1.412902  |
| H | -4.630409 | -3.274107 | 1.006400  |
| H | -2.936653 | -1.328981 | -0.469803 |
| H | -2.521992 | -0.413440 | 1.009129  |
| H | -4.151116 | -1.067244 | 0.813701  |
| C | -3.030086 | 0.032235  | 3.847184  |
| C | -1.152287 | -1.306972 | 4.467877  |
| H | -3.794928 | 0.208626  | 3.085231  |
| H | -3.554185 | -0.116213 | 4.811466  |
| H | -2.428062 | 0.950459  | 3.941959  |
| H | -1.555488 | -1.526681 | 5.475736  |

|    |           |           |           |
|----|-----------|-----------|-----------|
| H  | -0.517645 | -0.410353 | 4.563061  |
| H  | -0.511235 | -2.141655 | 4.174963  |
| Ti | 0.957929  | -1.993078 | 0.768928  |
| B  | -1.218324 | -2.946768 | 1.042580  |
| H  | -0.731735 | -2.434548 | -0.023255 |
| H  | -0.407193 | -2.526953 | 1.922737  |
| H  | -1.162390 | -4.137926 | 0.979977  |
| N  | -2.682095 | -2.498519 | 1.291476  |
| B  | -2.909002 | -2.331515 | 2.966807  |
| H  | -2.470431 | -3.370951 | 3.415853  |
| H  | -4.123174 | -2.258566 | 3.059268  |
| N  | -2.195827 | -1.100681 | 3.476789  |
| H  | 1.349273  | -2.119256 | 2.362436  |

**TS<sub>10\_11</sub>**

**E = -767.7908104 Hartree**

|   |           |           |           |
|---|-----------|-----------|-----------|
| C | -0.026482 | 0.047165  | -0.036777 |
| C | 0.009836  | 0.098332  | 1.383696  |
| C | 1.368281  | 0.125185  | 1.793905  |
| C | 2.167287  | 0.060969  | 0.629844  |
| C | 1.305297  | 0.007471  | -0.502086 |
| H | -0.908808 | 0.024087  | -0.658588 |
| H | -0.838642 | 0.131062  | 2.047061  |
| H | 1.723562  | 0.191382  | 2.811109  |
| H | 3.247270  | 0.058449  | 0.607194  |
| H | 1.614958  | -0.051804 | -1.535996 |
| C | 1.225048  | -3.921861 | -0.598357 |
| C | 1.557173  | -4.267786 | 0.735949  |
| C | 2.715829  | -3.535920 | 1.111217  |
| C | 3.083582  | -2.725748 | 0.011993  |
| C | 2.154265  | -2.954021 | -1.041887 |
| H | 0.379813  | -4.296238 | -1.157029 |
| H | 1.015981  | -4.955142 | 1.367775  |
| H | 3.225923  | -3.596512 | 2.061089  |
| H | 3.924808  | -2.048904 | -0.021912 |
| H | 2.162105  | -2.479955 | -2.013357 |
| C | -3.274427 | -3.046252 | -0.222086 |
| C | -3.053616 | -1.179652 | 1.261937  |
| H | -2.824204 | -2.472357 | -1.040751 |
| H | -3.064229 | -4.106004 | -0.362342 |
| H | -4.358692 | -2.894318 | -0.223624 |
| H | -2.621899 | -0.571510 | 0.463273  |
| H | -2.686655 | -0.831655 | 2.225339  |
| H | -4.141809 | -1.068235 | 1.254491  |
| C | -1.395800 | -5.024371 | 3.358362  |
| H | -0.314306 | -5.023982 | 3.557785  |

|    |           |           |          |
|----|-----------|-----------|----------|
| H  | -1.598509 | -5.683089 | 2.512058 |
| H  | -1.906034 | -5.432133 | 4.246241 |
| C  | -1.533083 | -2.771847 | 4.154835 |
| H  | -0.448206 | -2.743187 | 4.325660 |
| H  | -1.863689 | -1.756557 | 3.925869 |
| H  | -2.030347 | -3.085960 | 5.086020 |
| Ti | 0.954835  | -1.974954 | 0.758223 |
| H  | -0.609478 | -2.380224 | 0.047389 |
| B  | -1.207333 | -3.052658 | 1.228043 |
| H  | -0.304721 | -2.494300 | 1.950358 |
| H  | -1.082230 | -4.169604 | 0.844058 |
| N  | -2.715795 | -2.606400 | 1.076892 |
| B  | -3.221764 | -3.505699 | 2.354238 |
| N  | -1.849320 | -3.674119 | 3.052385 |
| H  | -4.035194 | -2.874250 | 2.993757 |
| H  | -3.642313 | -4.556150 | 1.934781 |
| H  | 1.361935  | -2.103873 | 2.369269 |

**S<sub>11</sub>**

**E = -767.8100795 Hartree**

|   |           |           |           |
|---|-----------|-----------|-----------|
| C | -0.011787 | 0.067953  | -0.028946 |
| C | -0.009572 | 0.067873  | 1.389682  |
| C | 1.336957  | 0.095499  | 1.840963  |
| C | 2.169867  | 0.087758  | 0.698034  |
| C | 1.336217  | 0.068603  | -0.457766 |
| H | -0.883984 | 0.065078  | -0.664871 |
| H | -0.885960 | 0.046420  | 2.020705  |
| H | 1.663741  | 0.119502  | 2.869517  |
| H | 3.250972  | 0.078519  | 0.702607  |
| H | 1.670351  | 0.047556  | -1.485574 |
| C | 1.300803  | -4.165374 | -0.134967 |
| C | 2.217017  | -3.989177 | 0.925157  |
| C | 3.148316  | -2.987313 | 0.533982  |
| C | 2.823182  | -2.583450 | -0.785283 |
| C | 1.669344  | -3.287287 | -1.193092 |
| H | 0.443027  | -4.821357 | -0.134123 |
| H | 2.196852  | -4.497907 | 1.877379  |
| H | 3.957298  | -2.604182 | 1.140465  |
| H | 3.334270  | -1.819420 | -1.354924 |
| H | 1.145408  | -3.173092 | -2.131347 |
| C | -3.148213 | -2.205805 | 1.398031  |
| C | -3.047214 | -4.597716 | 1.124994  |
| H | -2.750854 | -2.046586 | 0.390932  |
| H | -2.857230 | -1.363696 | 2.025257  |
| H | -4.242053 | -2.258998 | 1.374373  |
| H | -4.141724 | -4.654230 | 1.128549  |

|    |           |           |           |
|----|-----------|-----------|-----------|
| H  | -2.641374 | -5.524117 | 1.530789  |
| H  | -2.692763 | -4.466444 | 0.096371  |
| C  | -0.976634 | -1.932933 | 4.367655  |
| H  | -1.571603 | -1.201139 | 3.822639  |
| H  | -1.272095 | -1.901342 | 5.421944  |
| H  | 0.082518  | -1.680960 | 4.259795  |
| C  | -0.461730 | -4.271794 | 4.617117  |
| H  | -0.785112 | -4.237934 | 5.663759  |
| H  | 0.608485  | -4.044814 | 4.557168  |
| H  | -0.641094 | -5.270907 | 4.220801  |
| Ti | 1.022036  | -1.958095 | 0.681380  |
| H  | -0.389532 | -2.241699 | -0.209456 |
| H  | 1.364355  | -2.209767 | 2.318798  |
| H  | -0.538595 | -2.431537 | 1.763018  |
| B  | -1.035302 | -3.429921 | 2.249469  |
| H  | -0.515851 | -4.466531 | 1.969502  |
| N  | -2.599623 | -3.461802 | 1.954252  |
| B  | -2.773512 | -3.630350 | 3.548929  |
| N  | -1.221284 | -3.285760 | 3.823174  |
| H  | -3.015435 | -4.773759 | 3.833494  |
| H  | -3.520436 | -2.812440 | 4.022829  |



**Cartesian coordinates of the intermediates and transition states involved in the titanocene-catalyzed dehydrogenation of diisopropylamine borane (D<sup>i</sup>PrAB)**

**Optimized at the B3LYP-GD3BJ/ 6-31G\*+6-31++G\*\*+LanL2DZ level of theory**

**H<sup>i</sup>Pr<sub>2</sub>NBH<sub>3</sub> E = -319.1329862 Hartree**

|   |           |           |           |
|---|-----------|-----------|-----------|
| H | 0.112315  | -1.302143 | 2.035699  |
| C | 0.674928  | -0.527247 | 2.561927  |
| C | 1.488115  | 0.312184  | 1.579363  |
| C | 0.584992  | 1.145412  | 0.671271  |
| H | 2.124026  | 1.000917  | 2.154612  |
| H | 1.305031  | -1.002153 | 3.318499  |
| H | -0.032679 | 0.125609  | 3.083205  |
| H | 1.162613  | 1.692336  | -0.083299 |
| H | -0.140171 | 0.518598  | 0.148506  |
| H | 0.047026  | 1.877999  | 1.282249  |
| C | 3.551526  | -1.132319 | 1.604030  |
| C | 4.882581  | -0.976273 | 0.867481  |
| C | 3.290556  | -2.590585 | 1.978615  |
| H | 3.336843  | -3.232383 | 1.096782  |
| H | 2.313610  | -2.730249 | 2.443343  |
| H | 4.060575  | -2.909403 | 2.690201  |
| H | 4.855248  | -1.506096 | -0.089522 |
| H | 5.116739  | 0.079665  | 0.678959  |
| H | 5.694964  | -1.394009 | 1.470188  |
| H | 3.593984  | -0.533400 | 2.523021  |
| N | 2.446250  | -0.523596 | 0.756353  |
| B | 1.773990  | -1.535412 | -0.365061 |
| H | 2.916916  | 0.157131  | 0.159975  |
| H | 1.215108  | -0.812916 | -1.159376 |
| H | 1.020148  | -2.291840 | 0.200397  |
| H | 2.711229  | -2.108451 | -0.877888 |

**S<sub>1</sub> E = -764.3657097 Hartree**

|   |           |          |           |
|---|-----------|----------|-----------|
| C | -0.705547 | 1.833401 | 1.072937  |
| C | -0.642404 | 2.375400 | -0.240329 |
| C | -1.942413 | 2.440334 | -0.774812 |
| C | -2.862333 | 1.943735 | 0.197639  |
| C | -2.092653 | 1.567176 | 1.357254  |
| H | 0.111116  | 1.773862 | 1.783128  |
| H | 0.258298  | 2.625607 | -0.784620 |
| H | -2.188798 | 2.760880 | -1.780029 |
| H | -3.940215 | 1.942924 | 0.115415  |

|    |           |           |           |
|----|-----------|-----------|-----------|
| H  | -2.492416 | 1.253158  | 2.310734  |
| C  | -1.517003 | -2.052667 | 0.679816  |
| C  | -1.466246 | -2.270440 | -0.716354 |
| C  | -2.633196 | -1.737072 | -1.306618 |
| C  | -3.446491 | -1.174307 | -0.272964 |
| C  | -2.745953 | -1.373327 | 0.969856  |
| H  | -0.778554 | -2.371793 | 1.403175  |
| H  | -0.633883 | -2.694378 | -1.263191 |
| H  | -2.851483 | -1.728702 | -2.367474 |
| H  | -4.442922 | -0.771644 | -0.390234 |
| H  | -3.121580 | -1.136237 | 1.955052  |
| C  | 2.053669  | -1.315124 | 0.368407  |
| C  | 3.280745  | -2.074421 | -0.122211 |
| C  | 1.944269  | -1.295383 | 1.895511  |
| H  | 1.169339  | -1.832399 | -0.005545 |
| H  | 1.060484  | -0.731957 | 2.215168  |
| H  | 2.826625  | -0.875523 | 2.383147  |
| H  | 1.825851  | -2.323865 | 2.253486  |
| H  | 3.186731  | -3.120077 | 0.189607  |
| H  | 3.352827  | -2.052126 | -1.211874 |
| H  | 4.208996  | -1.686780 | 0.307975  |
| C  | 3.055776  | 1.039760  | -0.283548 |
| C  | 3.712117  | 1.276255  | 1.076298  |
| C  | 4.084145  | 0.725108  | -1.371920 |
| H  | 2.557672  | 1.968678  | -0.577831 |
| H  | 3.594956  | 0.463610  | -2.312640 |
| H  | 4.691395  | 1.620652  | -1.541347 |
| H  | 4.760474  | -0.083362 | -1.087166 |
| H  | 4.389715  | 2.132693  | 0.994167  |
| H  | 2.974258  | 1.508308  | 1.852100  |
| H  | 4.305462  | 0.418146  | 1.404281  |
| Ti | -1.632860 | 0.123830  | -0.245264 |
| B  | 1.106885  | -0.015926 | -1.667985 |
| N  | 1.896246  | 0.065985  | -0.243562 |
| H  | 1.185844  | 0.510520  | 0.347424  |
| H  | -0.088730 | -0.150529 | -1.389783 |
| H  | 1.467465  | -0.994747 | -2.273573 |
| H  | 1.266974  | 1.017994  | -2.262663 |

**TS<sub>1,2</sub>**

**E = -764.3444493 Hartree**

|   |           |           |           |
|---|-----------|-----------|-----------|
| C | -0.033938 | -0.135009 | 0.060532  |
| C | 0.017539  | -0.012708 | 1.476216  |
| C | 1.363611  | 0.128047  | 1.879248  |
| C | 2.171658  | 0.094447  | 0.722984  |
| C | 1.306682  | -0.049596 | -0.401870 |

|    |           |           |           |
|----|-----------|-----------|-----------|
| H  | -0.922505 | -0.179268 | -0.552524 |
| H  | -0.836816 | 0.022542  | 2.131229  |
| H  | 1.715338  | 0.184373  | 2.900500  |
| H  | 3.250447  | 0.163007  | 0.697666  |
| H  | 1.615617  | -0.077073 | -1.436620 |
| C  | 1.132952  | -3.956366 | -0.662054 |
| C  | 2.046130  | -4.172273 | 0.412621  |
| C  | 3.129035  | -3.254979 | 0.278173  |
| C  | 2.884372  | -2.488083 | -0.880071 |
| C  | 1.651467  | -2.902256 | -1.445832 |
| H  | 0.236205  | -4.516496 | -0.881223 |
| H  | 1.976125  | -4.917850 | 1.189413  |
| H  | 3.984940  | -3.177123 | 0.933287  |
| H  | 3.500524  | -1.675665 | -1.240585 |
| H  | 1.168660  | -2.463349 | -2.309077 |
| Ti | 1.175228  | -2.052773 | 0.778213  |
| B  | 0.799953  | -3.069441 | 3.066340  |
| H  | 1.729891  | -2.404488 | 2.489256  |
| H  | 0.557821  | -2.429297 | 4.057511  |
| H  | 1.293802  | -4.141397 | 3.281811  |
| N  | -0.541014 | -3.217917 | 2.176874  |
| H  | -0.484728 | -2.751302 | 0.976812  |
| C  | -1.673796 | -2.387890 | 2.767318  |
| C  | -0.865186 | -4.668199 | 1.837152  |
| C  | -2.359950 | -3.025224 | 3.975531  |
| C  | -2.709830 | -1.899676 | 1.746269  |
| H  | -1.145178 | -1.521506 | 3.150393  |
| H  | -1.635786 | -3.419337 | 4.691581  |
| H  | -2.940888 | -2.243450 | 4.477680  |
| H  | -3.058852 | -3.816067 | 3.692425  |
| H  | -2.241483 | -1.607790 | 0.803466  |
| H  | -3.217788 | -1.020888 | 2.158902  |
| H  | -3.475893 | -2.648614 | 1.535047  |
| C  | -2.018813 | -4.818823 | 0.842794  |
| C  | -1.050030 | -5.608909 | 3.036634  |
| H  | 0.035398  | -4.998945 | 1.335062  |
| H  | -1.938340 | -4.105235 | 0.017284  |
| H  | -1.987431 | -5.830198 | 0.423118  |
| H  | -2.994785 | -4.695057 | 1.319536  |
| H  | -0.857350 | -6.630263 | 2.688498  |
| H  | -2.063157 | -5.589893 | 3.441054  |
| H  | -0.341668 | -5.391196 | 3.836819  |

**S<sub>2</sub>**

**E = -764.3912432 Hartree**

|   |           |          |          |
|---|-----------|----------|----------|
| C | -1.562094 | 1.988965 | 1.152868 |
|---|-----------|----------|----------|

|    |           |           |           |
|----|-----------|-----------|-----------|
| C  | -0.803356 | 2.417543  | 0.033575  |
| H  | -1.168910 | 2.251501  | -2.156482 |
| C  | -1.509045 | 2.082573  | -1.144996 |
| C  | -2.704312 | 1.432669  | -0.762993 |
| C  | -2.742598 | 1.389117  | 0.659281  |
| H  | -3.528160 | 0.962315  | 1.265497  |
| H  | -3.450571 | 1.035518  | -1.436556 |
| H  | -1.299279 | 2.124958  | 2.191356  |
| H  | 0.132959  | 2.944403  | 0.083932  |
| C  | -0.937585 | -2.237054 | 0.831645  |
| C  | -0.919750 | -2.340024 | -0.574140 |
| C  | -2.142143 | -1.813549 | -1.076313 |
| C  | -2.930700 | -1.436155 | 0.030689  |
| C  | -2.176847 | -1.649804 | 1.207957  |
| H  | -0.149254 | -2.521917 | 1.511814  |
| H  | -0.116060 | -2.712272 | -1.189615 |
| H  | -2.415934 | -1.737990 | -2.119570 |
| H  | -3.916561 | -0.997048 | -0.018953 |
| H  | -2.481215 | -1.410950 | 2.217607  |
| C  | 2.107739  | -1.253518 | 0.110981  |
| C  | 2.400473  | -1.293388 | 1.613969  |
| C  | 3.358608  | -1.686009 | -0.682008 |
| H  | 1.552613  | -0.921082 | 2.194694  |
| H  | 3.288245  | -0.711795 | 1.877411  |
| H  | 2.599086  | -2.330637 | 1.909495  |
| H  | 3.219791  | -1.537919 | -1.755392 |
| H  | 3.522332  | -2.756777 | -0.508813 |
| H  | 4.265604  | -1.166246 | -0.368222 |
| H  | 1.379860  | -2.032967 | -0.082290 |
| C  | 2.140940  | 1.291039  | -0.098340 |
| C  | 2.119521  | 1.776912  | 1.359443  |
| C  | 3.572543  | 1.375606  | -0.652103 |
| H  | 1.165221  | 1.556243  | 1.840657  |
| H  | 1.575587  | 2.006482  | -0.690127 |
| H  | 2.279425  | 2.862330  | 1.375934  |
| H  | 2.914766  | 1.330012  | 1.960115  |
| H  | 3.875981  | 2.429353  | -0.667316 |
| H  | 4.294872  | 0.840873  | -0.030135 |
| H  | 3.628343  | 0.991815  | -1.674266 |
| Ti | -0.952122 | -0.002040 | -0.043860 |
| N  | 1.429270  | -0.002475 | -0.371234 |
| B  | 0.907702  | -0.089886 | -1.812981 |
| H  | -0.262869 | 0.046511  | 1.454483  |
| H  | 1.165172  | 0.875659  | -2.490938 |
| H  | 1.093040  | -1.146480 | -2.361565 |
| H  | -0.389158 | -0.031794 | -1.761376 |

**S<sub>3</sub>****E = -764.3750149 Hartree**

|    |           |           |           |
|----|-----------|-----------|-----------|
| C  | 0.737742  | 2.215749  | 0.086915  |
| C  | 0.981140  | 1.773975  | 1.414480  |
| C  | 2.388215  | 1.631423  | 1.571917  |
| C  | 3.009070  | 2.007229  | 0.354041  |
| C  | 1.992460  | 2.355332  | -0.564878 |
| H  | -0.231437 | 2.403905  | -0.348400 |
| H  | 0.228830  | 1.584051  | 2.164527  |
| H  | 2.896660  | 1.287115  | 2.463388  |
| H  | 4.071001  | 1.992481  | 0.150186  |
| H  | 2.140365  | 2.642180  | -1.598334 |
| C  | 1.844088  | -1.859517 | -1.340140 |
| C  | 1.946376  | -2.257852 | 0.018951  |
| C  | 3.139637  | -1.694177 | 0.548997  |
| C  | 3.779331  | -0.965561 | -0.482224 |
| C  | 2.975678  | -1.053472 | -1.643695 |
| H  | 1.050177  | -2.123567 | -2.022444 |
| H  | 3.173216  | -0.568855 | -2.591419 |
| H  | 4.698848  | -0.404636 | -0.386665 |
| H  | 3.485982  | -1.787108 | 1.570438  |
| H  | 1.246798  | -2.882380 | 0.553804  |
| C  | -3.669508 | 0.420092  | -0.903540 |
| H  | -3.945908 | -0.497727 | -1.434361 |
| C  | -2.702360 | 1.196885  | -1.802381 |
| C  | -4.960057 | 1.200059  | -0.632798 |
| H  | -2.477401 | 2.178936  | -1.372998 |
| H  | -1.759098 | 0.653387  | -1.917141 |
| H  | -3.147689 | 1.355688  | -2.791743 |
| H  | -4.739290 | 2.136264  | -0.109083 |
| H  | -5.643249 | 0.612856  | -0.009227 |
| C  | -3.016968 | -1.477478 | 0.548294  |
| H  | -5.469275 | 1.442581  | -1.572958 |
| C  | -2.711385 | -1.911489 | 1.980373  |
| C  | -2.028837 | -2.135825 | -0.426824 |
| H  | -2.254133 | -1.887581 | -1.469052 |
| H  | -1.016440 | -1.785092 | -0.209200 |
| H  | -4.032621 | -1.826510 | 0.306270  |
| H  | -2.066093 | -3.227041 | -0.326140 |
| H  | -2.841592 | -2.996767 | 2.056221  |
| H  | -3.383223 | -1.430715 | 2.698658  |
| H  | -1.680335 | -1.671051 | 2.256877  |
| Ti | 1.668589  | 0.065571  | -0.019350 |
| B  | -2.480532 | 0.915869  | 1.248064  |
| N  | -3.031399 | -0.008832 | 0.367994  |

|   |           |           |           |
|---|-----------|-----------|-----------|
| H | 0.519465  | -0.565756 | 1.025102  |
| H | 0.370884  | 0.079757  | -1.085068 |
| H | -2.526235 | 2.078152  | 0.970032  |
| H | -1.982450 | 0.575106  | 2.273206  |

**S<sub>4</sub>** **E = -1083.5423575 Hartree**

|   |           |           |           |
|---|-----------|-----------|-----------|
| C | -1.721854 | -1.330267 | -2.367857 |
| C | -0.351796 | -1.078537 | -2.153195 |
| C | 0.188221  | -2.176467 | -1.426988 |
| C | -0.849790 | -3.118146 | -1.241253 |
| C | -2.042374 | -2.582055 | -1.772445 |
| H | -2.434306 | -0.684119 | -2.856482 |
| H | 0.196055  | -0.201845 | -2.461699 |
| H | 1.201703  | -2.260632 | -1.060277 |
| H | -0.759394 | -4.059621 | -0.719434 |
| H | -3.021871 | -3.039754 | -1.752548 |
| C | -1.608746 | -0.770925 | 2.387731  |
| C | -2.596432 | -1.712566 | 2.015594  |
| C | -1.934684 | -2.853511 | 1.508138  |
| C | -0.532580 | -2.619934 | 1.590417  |
| C | -0.331262 | -1.329984 | 2.128427  |
| H | -3.665377 | -1.562203 | 2.063606  |
| H | -2.415876 | -3.740065 | 1.119667  |
| H | 0.256725  | -3.291504 | 1.286597  |
| H | 0.625793  | -0.876158 | 2.326472  |
| H | -1.788609 | 0.189777  | 2.836806  |
| C | -1.679014 | 1.850616  | -1.482839 |
| C | -2.147939 | 2.028330  | 1.019126  |
| C | -0.258047 | 2.418085  | -1.409658 |
| C | -2.632099 | 2.893532  | -2.102601 |
| C | -2.943713 | 3.339829  | 0.924722  |
| C | -0.766505 | 2.302673  | 1.635085  |
| H | 0.410963  | 1.727000  | -0.892865 |
| H | 0.118633  | 2.576581  | -2.427363 |
| H | -0.223548 | 3.386098  | -0.901415 |
| H | -2.372784 | 3.010901  | -3.162091 |
| H | -3.671550 | 2.562305  | -2.047109 |
| H | -2.550550 | 3.878363  | -1.638523 |
| H | -1.650464 | 1.041566  | -2.203447 |
| H | -2.406347 | 4.118098  | 0.376691  |
| H | -3.114320 | 3.716987  | 1.940287  |
| H | -3.917594 | 3.180133  | 0.454342  |
| H | -0.890722 | 2.550788  | 2.696672  |
| H | -0.261646 | 3.150620  | 1.166587  |
| H | -0.117304 | 1.429987  | 1.553665  |

|    |           |           |           |
|----|-----------|-----------|-----------|
| H  | -2.703325 | 1.419132  | 1.727739  |
| C  | 4.280616  | 0.432628  | -0.961964 |
| C  | 2.865159  | 0.892859  | 1.096047  |
| C  | 3.157064  | 0.006813  | -1.899714 |
| C  | 5.641176  | -0.128263 | -1.375477 |
| C  | 2.878948  | 0.677705  | 2.610369  |
| C  | 2.967148  | 2.387483  | 0.777628  |
| H  | 4.364976  | 1.522456  | -0.985914 |
| H  | 3.077216  | -1.081471 | -1.939530 |
| H  | 3.364888  | 0.380248  | -2.907878 |
| H  | 2.193298  | 0.410672  | -1.580051 |
| H  | 5.904259  | 0.267762  | -2.361867 |
| H  | 6.427472  | 0.179136  | -0.673744 |
| H  | 5.631642  | -1.218328 | -1.424280 |
| H  | 1.933036  | 0.492667  | 0.688713  |
| H  | 2.800084  | -0.378374 | 2.868652  |
| H  | 2.041512  | 1.219816  | 3.060577  |
| H  | 3.805970  | 1.068743  | 3.051935  |
| H  | 2.222099  | 2.921075  | 1.374453  |
| H  | 3.954201  | 2.789353  | 1.041430  |
| H  | 2.763214  | 2.618573  | -0.270698 |
| Ti | -1.407025 | -1.093159 | 0.000116  |
| N  | -2.156998 | 1.189024  | -0.223778 |
| B  | -3.466742 | 0.400881  | -0.389044 |
| H  | -3.191570 | -0.855153 | -0.220493 |
| H  | -0.063038 | -0.137732 | 0.108155  |
| H  | -3.933791 | 0.415692  | -1.499715 |
| H  | -4.271178 | 0.595498  | 0.490571  |
| N  | 3.964671  | 0.057768  | 0.468733  |
| B  | 3.703671  | -1.568446 | 0.725771  |
| H  | 2.503061  | -1.723594 | 0.711853  |
| H  | 4.251672  | -2.182233 | -0.156936 |
| H  | 4.190003  | -1.817447 | 1.807435  |
| H  | 4.813895  | 0.270600  | 0.994820  |
